# Supplementary material for: optoPAD: a closed-loop optogenetics system to study the circuit basis of feeding behaviors
Source: bioRxiv or medRxiv preprint supplement (doi:10.1101/485110), 2018-12-03
Supplement: Supplementary file [file media-2.pdf]

## Supplementary Table

| figure | line                   | full genotype                                                                   | source              |
|--------|------------------------|---------------------------------------------------------------------------------|---------------------|
| 2,3    | ;Gr5a-GAL4;            | ;Gr5a-GAL4; Gr5a-GAL4                                                           | Kristin Scott       |
| 2,3,4  | ;;pUAS-Chrimson-mVenus | w <sup>1118</sup> ; P{20XUAS-IVS-CsChrimson.mVenus}attP2                        | BDSC                |
| 2      | ;;57F03-GAL4           | w <sup>1118</sup> ; P{GMR57F03-GAL4}attP2                                       | BDSC                |
| 2      | ;;pBDP-GAL4Uw          | w <sup>[1118]</sup> ; P{y <sup>[+t7.7]</sup> w <sup>[+mC]</sup> =GAL4.1Uw}attP2 | BDSC                |
| 2,3    | w <sup>[1118]</sup> ;; |                                                                                 | Barry Dickson       |
| 2,3    | ; ;UAS-GtACR1          | w <sup>[1118]</sup> ;; 20xUAS-GtACR1 (attP2)                                    | Adam Claridge-Chang |
| 3      | ;;Gr-64f-GAL4          | w <sup>[*]</sup> ;; P{w <sup>[+mC]</sup> =Gr64f-GAL4.9.7}1/TM3, Sb[1]           | BDSC                |
| 3      | ;;attP2                | y <sup>1</sup> w <sup>67c23</sup> ; P{CaryP}attP2                               | BDSC                |
| 3,4    | Gr66a-GAL4             | w <sup>[*]</sup> ; P{w <sup>[+mC]</sup> =Gr66a-GAL4.D}2;                        | BDSC                |
